# Supplementary material for: Early increase in circulating carbonic anhydrase IX during neoadjuvant treatment predicts favourable outcome in locally advanced rectal cancer
Source: PubMed Central journal article supplement (PMC4513373; doi:10.1186/s12885-015-1557-6), 2015-07-24
Supplement: 12885_2015_1557_MOESM2_ESM.pdf [file 12885_2015_1557_MOESM2_ESM.pdf]

**Additional file 2: Figure S1. Receiver-operating characteristic analysis of the treatment-induced changes in serum carbonic anhydrase IX (CAIX) level for the prediction of progression-free survival in locally advanced rectal cancer.**

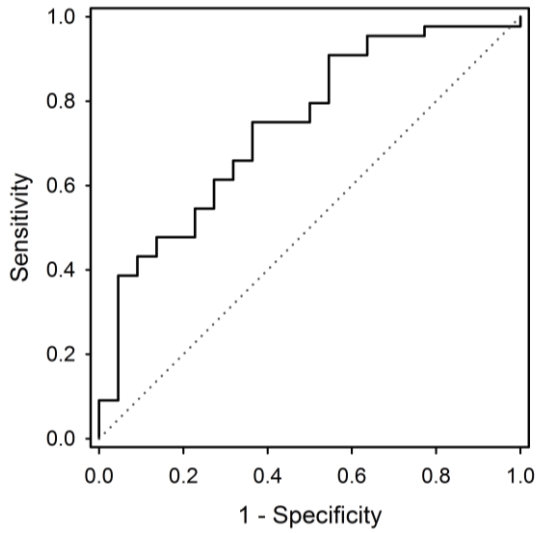

In 66 study patients with paired serum CAIX measurements following two cycles of neoadjuvant chemotherapy *versus* baseline (a variable termed  $\Delta$ NACT), diagnostic accuracy for prediction of 5-year progression-free survival had 96% specificity and 39% sensitivity at the  $\Delta$ NACT cut-off value of 224 pg/ml.
