# Supplementary material for: Early increase in circulating carbonic anhydrase IX during neoadjuvant treatment predicts favourable outcome in locally advanced rectal cancer
Source: PubMed Central journal article supplement (PMC4513373; doi:10.1186/s12885-015-1557-6), 2015-07-24
Supplement: 12885_2015_1557_MOESM3_ESM.pdf [file 12885_2015_1557_MOESM3_ESM.pdf]

**Additional file 3: Table S2. Progression-free survival in locally advanced rectal cancer.** Adjusted hazard ratio (HR) with 95% confidence interval (CI) was calculated by multivariate Cox regression analysis for each of the indicated variables.

|         |      | <b>HR<sup>1</sup></b> | <b>95% CI</b> | <b><i>p</i>-value</b> |
|---------|------|-----------------------|---------------|-----------------------|
| ΔNACT   |      | 0.995                 | 0.990–1.00    | 0.04                  |
| Age     |      | 0.968                 | 0.926–1.01    | 0.14                  |
| T stage | T2–3 |                       |               |                       |
|         | T4   | 1.78                  | 0.722–4.41    | 0.20                  |

ΔNACT: paired serum sample measurements of CAIX following two cycles of neoadjuvant chemotherapy *versus* baseline.

<sup>1</sup>: HR less than 1 indicates that patients had higher probability of favourable progression-free survival.
